# Supplementary material for: Optimizing External Beam Radiotherapy as per the Risk Group of Localized Prostate Cancer: A Nationwide Multi-Institutional Study (KROG 18-15)
Source: MDPI journal article supplement (doi:10.3390/cancers13112732), 2021-05-31
Supplement: s1 [file s1]

Supplementary Figure

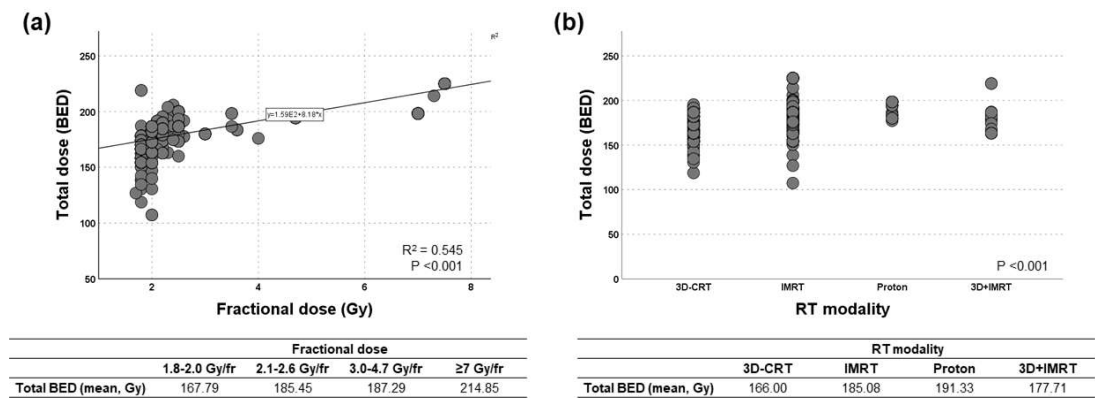

**Figure S1.** Distribution of total dose in biologically effective dose (BED) against different fractional doses (a) or different radiotherapy (RT) modalities (b). Total irradiated dose increased significantly as the fractional dose increased or with the use of modern RT modalities such as intensity-modulated RT (IMRT) or proton therapy (all  $p < 0.001$ ).

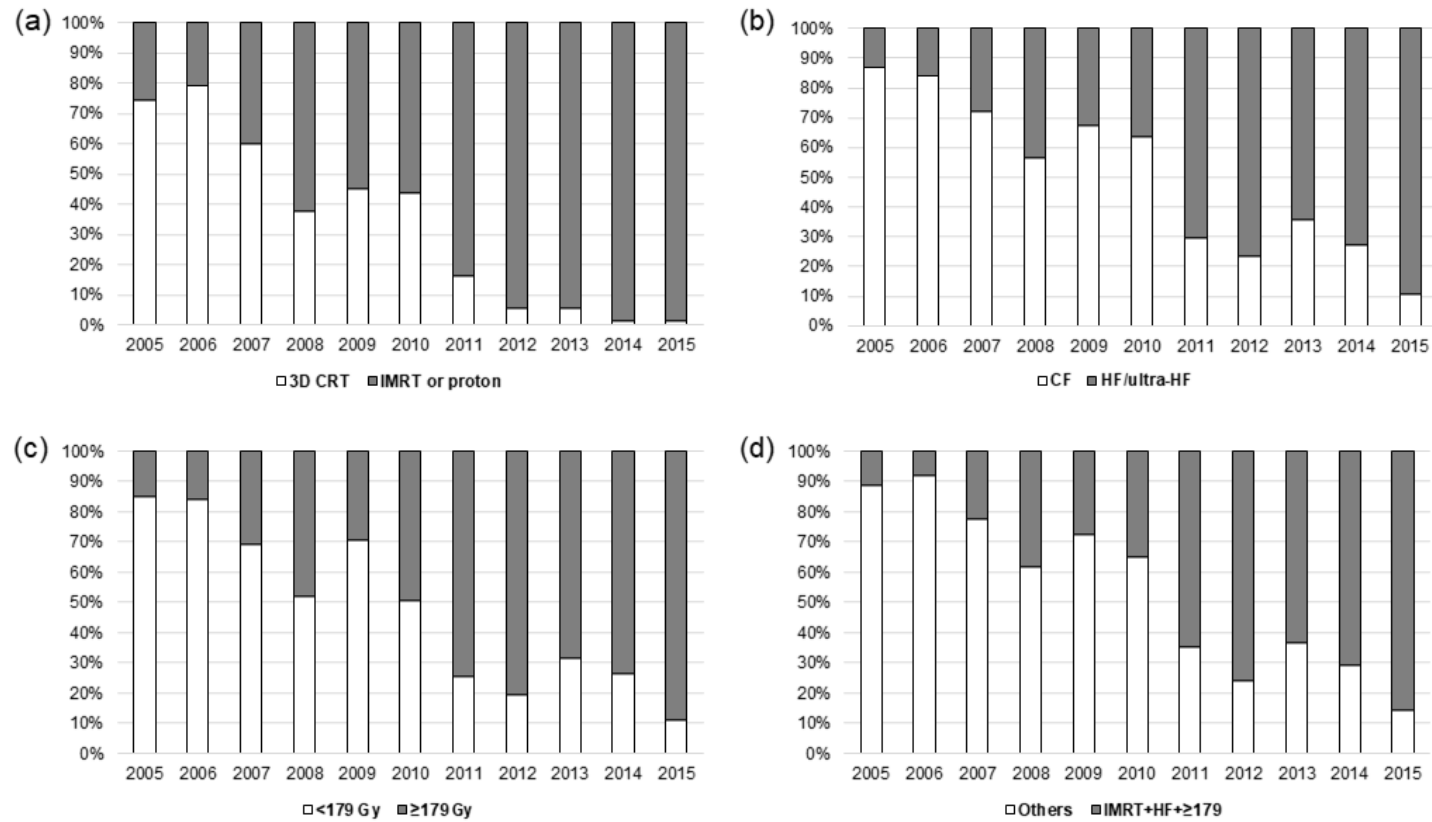

**Figure S2.** Temporal trends according to treatment year on specific radiotherapy (RT) techniques: (a) patients with intensity-modulated RT (IMRT) or proton therapy vs. 3 dimensional conformal RT, (b) patients with hypofractionation (HF) or ultra-HF vs. conventional fractionation (CF) RT, (c) patients with higher RT dose [ $\geq 179 \text{ Gy}_{1.5}$ ] vs. lower RT dose [ $< 179 \text{ Gy}_{1.5}$ ], and (d) patients with combined RT-related factors (IMRT, HF, and higher dose [ $\geq 179 \text{ Gy}_{1.5}$ ]).

## SUPPLEMENTARY TABLES

**Table S1.** Prostate cancer risk stratification criteria for different risk grouping systems.

|                | Very low risk                                                                                                                           | Low risk                                      | Intermediate risk                                                           |                                                                                              | High risk                                             | Very high risk                                                                 |
|----------------|-----------------------------------------------------------------------------------------------------------------------------------------|-----------------------------------------------|-----------------------------------------------------------------------------|----------------------------------------------------------------------------------------------|-------------------------------------------------------|--------------------------------------------------------------------------------|
|                |                                                                                                                                         |                                               | Favorable                                                                   | Unfavorable                                                                                  |                                                       |                                                                                |
| <b>D'Amico</b> |                                                                                                                                         | PSA ≤10 and<br>GS ≤6 and<br>cT1c-T2a          | PSA >10–20 or<br>GS 7 or<br>cT2b                                            |                                                                                              | PSA >20 or<br>GS 8–10 or<br>cT2c                      |                                                                                |
| <b>AUA</b>     |                                                                                                                                         | PSA <10 and<br>GS ≤6 (ISUP 1) and<br>cT1c-T2a | PSA 10–20 or<br>GS 7 (ISUP 2–3) or<br>cT2b                                  |                                                                                              | PSA >20 or<br>GS >7 (ISUP 4–5) or<br>cT2c             |                                                                                |
| <b>CPG</b>     |                                                                                                                                         | PSA <10 and<br>GS 6 (ISUP 1) and<br>cT1-T2    | PSA 10–20 or<br>GS 3 + 4 (ISUP 2)<br>and<br>cT1-T2                          | PSA 10–20 and<br>GS 3 + 4 (ISUP 2) and<br>cT1-T2<br>or<br>GS 4 + 3 (ISUP 3)<br>and<br>cT1-T2 | PSA >20 or<br>GS 8 (ISUP 4) or<br>cT3                 | More than one of PSA>20, GS 8 (ISUP 4), cT3 or<br>GS 9–10 (ISUP 5) or<br>cT4   |
| <b>NCCN</b>    | PSA <10 and<br>GS ≤6 (ISUP 1)<br>and<br>cT1c and<br><3 positive cores<br>and<br>≤50% cancer in<br>each core and<br>PSA density<br><0.15 | PSA <10 and<br>GS ≤6 (ISUP 1) and<br>cT1-T2a  | PSA 10–20 or<br>GS 3 + 4 (ISUP 2) or<br>cT2b-T2c and<br><50% positive cores | PSA 10–20 or<br>GS 3 + 4/4 + 3<br>(ISUP 2–3) or<br>cT2b-T2c                                  | PSA >20 or<br>GS 4 + 4/4 + 5 (ISUP 4–5)<br>or<br>cT3a | cT3b-T4 or<br>Primary Gleason pattern 5 or<br>>4 cores with grade group 4 or 5 |

AUA, American Urological Association; CPG, Cambridge Prognostic Groups; NCCN, National Comprehensive Cancer Network; PSA, Prostate-Specific Antigen; GS, Gleason score; ISUP, International Society of Urological Pathology

**Table S2.** Summary of treatment outcomes.

| Rate                                   | No.                 | %    |
|----------------------------------------|---------------------|------|
| Overall death                          | 148                 | 9.4  |
| Disease-related death                  | 33                  | 2.1  |
| Any recurrence                         | 319                 | 20.3 |
| Both - BCF first (or concurrently)     | 96                  | 6.1  |
| Both - CF first                        | 19                  | 1.2  |
| BCF only                               | 189                 | 12.0 |
| CF only                                | 15                  | 1.0  |
| Overall BCF events                     | 304                 | 19.3 |
| Timing (after first diagnosis, months) | Median 46 (2–211)   |      |
| Overall CF events                      | 131                 | 8.3  |
| Local                                  | 42                  | 2.7  |
| Timing (after first diagnosis, days)   | Median 531 (2–2524) |      |
| Regional                               | 28                  | 1.8  |
| Timing (after first diagnosis, days)   | Median 591 (4–2735) |      |
| Distant                                | 90                  | 5.7  |
| Timing (after first diagnosis, days)   | Median 413 (1–3380) |      |

BCF, Biochemical failure; CF, Clinical failure

**Table S3.** Clinical and treatment characteristics of patients after performing propensity score matching (matched group: IMRT/proton (n = 399) and 3D CRT (n = 399)).

|                                                   |              | Before matching          |      |                    |      | P<br>value | After matching          |      |                    |      | P<br>value |
|---------------------------------------------------|--------------|--------------------------|------|--------------------|------|------------|-------------------------|------|--------------------|------|------------|
|                                                   |              | IMRT/Proton<br>(n =1174) |      | 3D-CRT<br>(n =399) |      |            | IMRT/Proton<br>(n =399) |      | 3D-CRT<br>(n =399) |      |            |
|                                                   |              | No.                      | %    | No.                | %    |            | No.                     | %    | No.                | %    |            |
| Age (year,<br>mean)                               |              | 71.72                    |      | 70.8<br>9          |      | 0.028      | 71.04                   |      | 70.89              |      | 0.774      |
| T stage                                           | T2, 3, 4     | 1030                     | 87.7 | 325                | 81.5 | 0.004      | 326                     | 81.7 | 325                | 81.5 | 0.927      |
|                                                   | T1           | 144                      | 12.3 | 74                 | 18.5 |            | 73                      | 18.3 | 74                 | 18.5 |            |
| Gleason score                                     | <9           | 1000                     | 85.2 | 332                | 83.2 | 0.345      | 350                     | 87.7 | 332                | 83.2 | 0.071      |
|                                                   | ≥9           | 174                      | 14.8 | 67                 | 16.8 |            | 49                      | 12.3 | 67                 | 16.8 |            |
| iPSA                                              | <12          | 596                      | 50.8 | 186                | 46.6 | 0.152      | 193                     | 48.4 | 186                | 46.6 | 0.620      |
|                                                   | ≥12          | 578                      | 49.2 | 213                | 53.4 |            | 206                     | 51.6 | 213                | 53.4 |            |
| NCCN risk<br>group                                | Low          | 134                      | 11.4 | 43                 | 10.8 | 0.279      | 65                      | 16.3 | 43                 | 10.8 | 0.002      |
|                                                   | Intermediate | 304                      | 25.9 | 104                | 26.1 |            | 120                     | 30.1 | 104                | 26.1 |            |
|                                                   | High         | 578                      | 49.2 | 183                | 45.9 |            | 176                     | 44.1 | 183                | 45.9 |            |
|                                                   | Very high    | 158                      | 13.5 | 69                 | 17.3 |            | 38                      | 9.5  | 69                 | 17.3 |            |
| RT volume                                         | Prostate     | 762                      | 64.9 | 266                | 66.7 | 0.140      | 329                     | 82.5 | 266                | 66.7 | <0.001     |
|                                                   | Whole pelvis | 401                      | 34.2 | 133                | 33.3 |            | 65                      | 16.3 | 133                | 33.3 |            |
|                                                   | Unknown      | 11                       | 0.9  | 0                  | 0.0  |            | 5                       | 1.3  | 0                  | 0.0  |            |
| RT scheme                                         | CF           | 457                      | 38.9 | 378                | 94.7 | <0.001     | 378                     | 94.7 | 378                | 94.7 | 0.999      |
|                                                   | HF           | 717                      | 61.1 | 21                 | 5.3  |            | 21                      | 5.3  | 21                 | 5.3  |            |
| Total dose,<br>BED (Gy <sub>1.5</sub> )<br>(mean) |              | 185.08                   |      | 166.<br>61         |      | <0.001     | 186.24                  |      | 166.61             |      | <0.001     |
| ADT                                               | No           | 426                      | 36.3 | 163                | 40.9 | 0.104      | 177                     | 44.4 | 163                | 40.9 | 0.316      |
|                                                   | Yes          | 748                      | 63.7 | 236                | 59.1 |            | 222                     | 55.6 | 236                | 59.1 |            |

3D CRT, 3-dimensional conformal radiotherapy; IMRT, Intensity-modulated radiotherapy; PSA, Prostate-Specific Antigen; NCCN, National Comprehensive Cancer Network; RT, Radiotherapy; SV, Seminal vesicle; CF, conventional fractionation; HF, hypofractionation; BED, Biologically effective dose; ADT, Androgen deprivation therapy

**Table S4.** Results of univariate and multivariate analyses for biochemical failure-free survival in all patients and each NCCN risk group after performing propensity score matching.

| All patients                             |          | Univariate          |          | Multivariate        |  |
|------------------------------------------|----------|---------------------|----------|---------------------|--|
|                                          | p value  | HR (95% CI)         | p value  | HR (95% CI)         |  |
| T stage (T1 vs. T2, T3, T4)              | 0.022    | 0.688 (0.499-0.948) | 0.084    | 0.740 (0.526-1.042) |  |
| Gleason score ( $\geq 9$ vs. $<9$ )      | 0.002    | 1.600 (1.188-2.155) | $<0.001$ | 1.833 (1.328-2.528) |  |
| initial PSA ( $\geq 12$ vs. $<12$ )      | 0.006    | 1.403 (1.104-1.783) | 0.003    | 1.499 (1.148-1.958) |  |
| RT volume (Pelvis vs. Prostate $\pm$ SV) | 0.699    | 1.027 (0.896-1.178) | 0.673    | 1.062 (0.804-1.403) |  |
| RT scheme (CF vs. HF)                    | 0.526    | 1.110 (0.804-1.534) | 0.353    | 0.778 (0.458-1.321) |  |
| BED $\geq 179$ Gy1.5 vs. $<179$ Gy1.5    | 0.153    | 0.816 (0.617-1.079) | 0.090    | 0.687 (0.445-1.061) |  |
| RT modality (3D vs. IMRT/proton)         | 0.396    | 1.111 (0.871-1.416) | 0.742    | 1.046 (0.800-1.369) |  |
| ADT combination (Yes vs. No)             | 0.031    | 0.741 (0.584-0.939) | $<0.001$ | 0.539 (0.412-0.707) |  |
| Low risk group patients                  |          | Univariate          |          | Multivariate        |  |
|                                          | p value  | HR (95% CI)         | p value  | HR (95% CI)         |  |
| T stage (T1 vs. T2, T3, T4)              | 0.506    | 1.383 (0.533-3.590) | 0.462    | 1.470 (0.527-4.106) |  |
| RT volume (Pelvis vs. Prostate $\pm$ SV) | 0.541    | 1.578 (0.366-6.798) | 0.422    | 1.891 (0.400-8.946) |  |
| RT scheme (CF vs. HF)                    | 0.404    | 0.676 (0.269-1.696) | 0.454    | 0.525 (0.097-2.833) |  |
| BED $\geq 179$ Gy1.5 vs. $<179$ Gy1.5    | 0.693    | 1.196 (0.492-2.908) | 0.877    | 0.888 (0.198-3.981) |  |
| RT modality (3D vs. IMRT/proton)         | 0.976    | 1.014 (0.417-2.465) | 0.733    | 1.253 (0.344-4.563) |  |
| ADT combination (Yes vs. No)             | 0.402    | 0.627 (0.211-1.868) | 0.578    | 0.724 (0.233-2.256) |  |
| Intermediate risk patients               |          | Univariate          |          | Multivariate        |  |
|                                          | p value  | HR (95% CI)         | p value  | HR (95% CI)         |  |
| T stage (T1 vs. T2, T3, T4)              | 0.786    | 0.932 (0.562-1.547) | 0.940    | 0.980 (0.585-1.644) |  |
| initial PSA ( $\geq 12$ vs. $<12$ )      | 0.803    | 0.941 (0.581-1.524) | 0.845    | 0.952 (0.580-1.563) |  |
| RT volume (Pelvis vs. Prostate $\pm$ SV) | 0.709    | 0.869 (0.416-1.814) | 0.495    | 0.770 (0.364-1.631) |  |
| RT scheme (CF vs. HF)                    | 0.609    | 1.170 (0.641-2.137) | 0.639    | 1.357 (0.379-4.862) |  |
| BED $\geq 179$ Gy1.5 vs. $<179$ Gy1.5    | 0.700    | 0.896 (0.514-1.563) | 0.927    | 0.948 (0.304-2.959) |  |
| RT modality (3D vs. IMRT/proton)         | 0.811    | 1.059 (0.663-1.691) | 0.730    | 0.908 (0.526-1.568) |  |
| ADT combination (Yes vs. No)             | 0.044    | 0.602 (0.367-0.987) | 0.035    | 0.572 (0.340-0.962) |  |
| High risk patients                       |          | Univariate          |          | Multivariate        |  |
|                                          | p value  | HR (95% CI)         | p value  | HR (95% CI)         |  |
| T stage (T1 vs. T2, T3, T4)              | 0.996    | 0.998 (0.505-1.972) | 0.973    | 1.021 (0.504-2.034) |  |
| Gleason score ( $\geq 9$ vs. $<9$ )      | 0.871    | 0.956 (0.5591-6.38) | 0.271    | 1.368 (0.783-2.390) |  |
| initial PSA ( $\geq 12$ vs. $<12$ )      | 0.917    | 1.022 (0.682-1.530) | 0.358    | 1.222 (0.797-1.876) |  |
| RT volume (Pelvis vs. Prostate $\pm$ SV) | 0.781    | 1.053 (0.731-1.518) | 0.484    | 0.873 (0.595-1.279) |  |
| RT scheme (CF vs. HF)                    | 0.988    | 0.996 (0.606-1.639) | 0.186    | 0.574 (0.252-1.306) |  |
| BED $\geq 179$ Gy1.5 vs. $<179$ Gy1.5    | 0.041    | 0.727 (0.476-0.956) | 0.029    | 0.468 (0.237-0.924) |  |
| RT modality (3D vs. IMRT/proton)         | 0.099    | 1.349 (0.946-1.925) | 0.071    | 1.420 (0.970-2.078) |  |
| ADT combination (Yes vs. No)             | $<0.001$ | 0.442 (0.308-0.633) | $<0.001$ | 0.391 (0.265-0.577) |  |
| Very-high risk patients                  |          | Univariate          |          | Multivariate        |  |
|                                          | p value  | HR (95% CI)         | p value  | HR (95% CI)         |  |
| Gleason score ( $\geq 9$ vs. $<9$ )      | 0.009    | 2.658 (1.281-5.515) | 0.021    | 2.531 (1.147-5.582) |  |
| initial PSA ( $\geq 12$ vs. $<12$ )      | 0.068    | 1.811 (0.957-3.427) | 0.161    | 1.670 (0.815-3.420) |  |
| RT volume (Pelvis vs. Prostate $\pm$ SV) | 0.554    | 1.190 (0.669-2.115) | 0.319    | 1.364 (0.741-2.510) |  |
| RT scheme (CF vs. HF)                    | 0.656    | 0.792 (0.283-2.216) | 0.708    | 0.760 (0.182-3.183) |  |
| BED $\geq 179$ Gy1.5 vs. $<179$ Gy1.5    | 0.892    | 1.046 (0.544-2.013) | 0.876    | 1.066 (0.477-2.381) |  |
| RT modality (3D vs. IMRT/proton)         | 0.035    | 0.537 (0.301-0.958) | 0.019    | 0.467 (0.248-0.880) |  |
| ADT combination (Yes vs. No)             | 0.513    | 0.792 (0.394-1.594) | 0.077    | 0.481 (0.213-1.084) |  |

HR, Hazard ratio; CI, Confidence Interval; PSA, Prostate-Specific Antigen; RT, Radiotherapy; SV, Seminal vesicle; 3D, 3-dimensional conformal radiotherapy; IMRT, Intensity-modulated radiotherapy; CF, conventional fractionation; HF, hypofractionation; BED, Biologically effective dose; ADT, Androgen deprivation therapy

**Table S5.** Toxicity rates stratified by RTOG radiation toxicity criteria in all patients (n = 1,573).

| Toxicity          | Grade   | No.  | %    |
|-------------------|---------|------|------|
| Acute GU toxicity | No      | 983  | 62.5 |
|                   | Grade 1 | 421  | 26.8 |
|                   | Grade 2 | 161  | 10.2 |
|                   | Grade 3 | 8    | 0.5  |
| Acute GI toxicity | No      | 1302 | 82.8 |
|                   | Grade 1 | 173  | 11.0 |
|                   | Grade 2 | 97   | 6.2  |
|                   | Grade 3 | 1    | 0.1  |
| Late GU toxicity  | No      | 1278 | 81.2 |
|                   | Grade 1 | 85   | 5.4  |
|                   | Grade 2 | 195  | 12.4 |
|                   | Grade 3 | 15   | 1.0  |
| Late GI toxicity  | No      | 1340 | 85.2 |
|                   | Grade 1 | 131  | 8.3  |
|                   | Grade 2 | 79   | 5.0  |
|                   | Grade 3 | 23   | 1.5  |

GU, Genitourinary; GI, Gastrointestinal

**\* Toxicity rates according to follow-up duration:**

|                   |         | <5 years follow-up |      | ≥5 years of follow-up |       | p value |
|-------------------|---------|--------------------|------|-----------------------|-------|---------|
|                   |         | No.                | %    | No.                   | %     |         |
| Acute GU toxicity | No      | 285                | 29.0 | 698                   | 71.0  | 0.303   |
|                   | Grade 1 | 140                | 33.3 | 281                   | 66.7  |         |
|                   | Grade 2 | 43                 | 26.7 | 118                   | 73.3  |         |
|                   | Grade 3 | 3                  | 37.5 | 5                     | 62.5  |         |
| Acute GI toxicity | No      | 403                | 31.0 | 899                   | 69.0  | 0.214   |
|                   | Grade 1 | 41                 | 23.7 | 132                   | 76.3  |         |
|                   | Grade 2 | 27                 | 27.8 | 70                    | 72.2  |         |
|                   | Grade 3 | 0                  | 0.0  | 1                     | 100.0 |         |
| Late GU toxicity  | No      | 386                | 30.2 | 892                   | 69.8  | 0.833   |
|                   | Grade 1 | 24                 | 28.2 | 61                    | 71.8  |         |
|                   | Grade 2 | 58                 | 29.7 | 137                   | 70.3  |         |
|                   | Grade 3 | 3                  | 20.0 | 12                    | 80.0  |         |
| Late GI toxicity  | No      | 396                | 29.6 | 944                   | 70.4  | 0.208   |
|                   | Grade 1 | 43                 | 32.8 | 88                    | 67.2  |         |
|                   | Grade 2 | 21                 | 26.6 | 58                    | 73.4  |         |
|                   | Grade 3 | 11                 | 47.8 | 12                    | 52.2  |         |

GU, Genitourinary; GI, Gastrointestinal

|                   |          | <5 years follow-up |      | ≥5 years of follow-up |      | p value |
|-------------------|----------|--------------------|------|-----------------------|------|---------|
|                   |          | No.                | %    | No.                   | %    |         |
| Acute GU toxicity | <Grade 2 | 425                | 30.3 | 979                   | 69.7 | 0.413   |
|                   | ≥Grade 2 | 46                 | 27.2 | 123                   | 72.8 |         |
| Acute GI toxicity | <Grade 2 | 444                | 30.1 | 1031                  | 69.9 | 0.593   |

|                  |          |     |      |      |      |       |
|------------------|----------|-----|------|------|------|-------|
|                  | ≥Grade 2 | 27  | 27.6 | 71   | 72.4 |       |
| Late GU toxicity | <Grade 2 | 410 | 30.1 | 953  | 69.9 | 0.761 |
|                  | ≥Grade 2 | 61  | 29.0 | 149  | 71.0 |       |
| Late GI toxicity | <Grade 2 | 439 | 29.8 | 1032 | 70.2 | 0.744 |
|                  | ≥Grade 2 | 32  | 31.4 | 70   | 68.6 |       |

GU, Genitourinary; GI, Gastrointestinal

**\* Mean values of follow-up duration between patients who underwent toxicities and the rest**

|                   |     | Follow-up duration (mean) | p value |
|-------------------|-----|---------------------------|---------|
| Acute GU toxicity | No  | 81.24                     | 0.323   |
|                   | Yes | 79.57                     |         |
| Acute GI toxicity | No  | 79.75                     | 0.021   |
|                   | Yes | 84.74                     |         |
| Late GU toxicity  | No  | 80.72                     | 0.791   |
|                   | Yes | 80.16                     |         |
| Late GI toxicity  | No  | 80.62                     | 0.039   |
|                   | Yes | 80.58                     |         |

GU, Genitourinary; GI, Gastrointestinal

|                   |          | Follow-up duration (mean) | p value |
|-------------------|----------|---------------------------|---------|
| Acute GU toxicity | <Grade 2 | 80.57                     | 0.893   |
|                   | ≥Grade 2 | 80.93                     |         |
| Acute GI toxicity | <Grade 2 | 80.52                     | 0.654   |
|                   | ≥Grade 2 | 82.03                     |         |
| Late GU toxicity  | <Grade 2 | 80.94                     | 0.261   |
|                   | ≥Grade 2 | 78.50                     |         |
| Late GI toxicity  | <Grade 2 | 80.68                     | 0.740   |
|                   | ≥Grade 2 | 79.59                     |         |

GU, Genitourinary; GI, Gastrointestinal

**Table S6.** Toxicity rates stratified by RTOG radiation toxicity criteria in patients treated with a combination of three factors (intensity-modulated radiotherapy (IMRT), hypofractionation, and higher dose ( $\geq 179$  Gy<sub>1.5</sub>)) (n = 829).

| Toxicity          | Grade   | No. | %    |
|-------------------|---------|-----|------|
| Acute GU toxicity | No      | 496 | 59.8 |
|                   | Grade 1 | 236 | 28.5 |
|                   | Grade 2 | 89  | 10.7 |
|                   | Grade 3 | 8   | 1.0  |
| Acute GI toxicity | No      | 697 | 84.1 |
|                   | Grade 1 | 77  | 9.3  |
|                   | Grade 2 | 55  | 6.6  |
|                   | Grade 3 | 0   | 0.0  |
| Late GU toxicity  | No      | 630 | 76.0 |
|                   | Grade 1 | 53  | 6.4  |
|                   | Grade 2 | 138 | 16.6 |
|                   | Grade 3 | 8   | 1.0  |
| Late GI toxicity  | No      | 695 | 83.8 |
|                   | Grade 1 | 75  | 9.0  |
|                   | Grade 2 | 46  | 5.5  |
|                   | Grade 3 | 13  | 1.6  |

GU, Genitourinary; GI, Gastrointestinal

**\* Toxicity rates according to follow-up duration:**

|                   |         | <5 years follow-up |      | $\geq 5$ years of follow-up |      | p value |
|-------------------|---------|--------------------|------|-----------------------------|------|---------|
|                   |         | No.                | %    | No.                         | %    |         |
| Acute GU toxicity | No      | 124                | 41.5 | 175                         | 58.5 | 0.528   |
|                   | Grade 1 | 73                 | 45.9 | 86                          | 54.1 |         |
|                   | Grade 2 | 28                 | 36.4 | 49                          | 63.6 |         |
|                   | Grade 3 | 2                  | 33.3 | 4                           | 66.7 |         |
| Acute GI toxicity | No      | 192                | 43.3 | 251                         | 56.7 | 0.026   |
|                   | Grade 1 | 14                 | 25.5 | 41                          | 74.5 |         |
|                   | Grade 2 | 21                 | 48.8 | 22                          | 51.2 |         |
|                   | Grade 3 | 0                  | 0.0  | 0                           | 0.0  |         |
| Late GU toxicity  | No      | 166                | 43.9 | 212                         | 56.1 | 0.833   |
|                   | Grade 1 | 13                 | 32.5 | 27                          | 67.5 |         |
|                   | Grade 2 | 45                 | 39.1 | 70                          | 60.9 |         |
|                   | Grade 3 | 3                  | 37.5 | 5                           | 62.5 |         |
| Late GI toxicity  | No      | 188                | 40.4 | 277                         | 59.6 | 0.208   |
|                   | Grade 1 | 19                 | 45.2 | 23                          | 54.8 |         |
|                   | Grade 2 | 13                 | 54.2 | 11                          | 45.8 |         |
|                   | Grade 3 | 7                  | 70.0 | 3                           | 30.0 |         |

GU, Genitourinary; GI, Gastrointestinal

|                   |                | <5 years follow-up |      | $\geq 5$ years of follow-up |      | p value |
|-------------------|----------------|--------------------|------|-----------------------------|------|---------|
|                   |                | No.                | %    | No.                         | %    |         |
| Acute GU toxicity | <Grade 2       | 197                | 43.0 | 261                         | 57.0 | 0.243   |
|                   | $\geq$ Grade 2 | 30                 | 36.1 | 53                          | 63.9 |         |
| Acute GI toxicity | <Grade 2       | 206                | 41.4 | 292                         | 58.6 | 0.341   |
|                   | $\geq$ Grade 2 | 21                 | 48.8 | 22                          | 51.2 |         |
| Late GU toxicity  | <Grade 2       | 179                | 42.8 | 239                         | 57.2 | 0.453   |
|                   | $\geq$ Grade 2 | 48                 | 39.0 | 75                          | 61.0 |         |
| Late GI toxicity  | <Grade 2       | 207                | 40.8 | 300                         | 59.2 | 0.04    |
|                   | $\geq$ Grade 2 | 20                 | 58.8 | 14                          | 41.2 |         |

GU, Genitourinary; GI, Gastrointestinal
